# Supplementary material for: Plant genotype controls wetland soil microbial functioning in response to sea-level rise
Source: Copernicus journal article supplement (doi:10.5194/bg-18-6133-2021), 2021-11-30
Supplement: Supplementary file 1 [file bg-18-6133-2021-supplement.pdf]

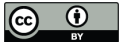

*Supplement of*

## **Plant genotype controls wetland soil microbial functioning in response to sea-level rise**

**Hao Tang et al.**

*Correspondence to:* Peter Mueller ([peter.mueller@uni-hamburg.de](mailto:peter.mueller@uni-hamburg.de))

The copyright of individual parts of the supplement might differ from the article licence.

## Supplementary materials

**Table S1: Activity of  $\beta$ -glucosidase (GLU), cellobiosidase (CEB), chitinase (CHI), and leucine-aminopeptidase (LAP) as well as decomposition rate constant ( $k$ ) and stabilization factor ( $S$ ) in unplanted soils exposed to three different flooding frequencies (monthly, weekly and daily), values are means and SE ( $n = 4$ ). Values not connected by the same letter within one column are significantly different at  $p \leq 0.05$  based on Tukey's HSD tests. Corresponding one-way ANOVA results are included below (p-values bold typed at  $p \leq 0.05$ ).**

| Flooding                     | GLU                 | CEB                | CHI                | LAP                 | $k$                 | $S$               |
|------------------------------|---------------------|--------------------|--------------------|---------------------|---------------------|-------------------|
| Monthly                      | 27.20 $\pm$ 2.67 a  | 14.24 $\pm$ 2.37 a | 12.21 $\pm$ 2.09 a | 63.97 $\pm$ 3.61 a  | 0.016 $\pm$ 0.003 a | 0.17 $\pm$ 0.02 a |
| Weekly                       | 24.26 $\pm$ 4.93 a  | 12.30 $\pm$ 1.86 a | 11.32 $\pm$ 2.51 a | 55.09 $\pm$ 10.53 a | 0.012 $\pm$ 0.003 a | 0.17 $\pm$ 0.01 a |
| Daily                        | 32.32 $\pm$ 10.78 a | 12.29 $\pm$ 3.48 a | 11.95 $\pm$ 2.65 a | 56.40 $\pm$ 8.16 a  | 0.010 $\pm$ 0.000 a | 0.10 $\pm$ 0.02 a |
| <i>One-way ANOVA results</i> |                     |                    |                    |                     |                     |                   |
|                              | F                   | p                  | F                  | p                   | F                   | p                 |
| Flooding                     | 0.338               | 0.722              | 0.179              | 0.839               | 0.036               | 0.965             |
|                              | F                   | p                  | F                  | p                   | F                   | p                 |
| Flooding                     | 0.338               | 0.722              | 0.179              | 0.839               | 0.036               | 0.965             |

**Table S2: Correlations between soil microbial C- and N-enzyme activities and litter-breakdown parameters. Shown are Pearson correlation coefficients ( $r$ ). Significant ( $p \leq 0.05$ ) correlations are highlighted in bold font.**

|                       | C activity  | N activity   | $\Delta$ C activity | $\Delta$ N activity |
|-----------------------|-------------|--------------|---------------------|---------------------|
| Decomp. rate ( $k$ )  | <b>0.49</b> | 0.20         | <b>0.52</b>         | <b>0.29</b>         |
| Stabilization ( $S$ ) | -0.10       | -0.08        | -0.04               | -0.04               |
| $\Delta k$            | <b>0.39</b> | 0.04         | <b>0.41</b>         | 0.20                |
| $\Delta S$            | -0.22       | <b>-0.34</b> | -0.22               | -0.27               |

Notes: C activity = sum of C-acquisition enzyme activities ( $\beta$ -glucosidase + cellobiosidase); N activity = sum of N-acquisition enzyme activities (aminopeptidase + chitinase); Decomp. rate ( $k$ ) = decomposition rate constant (*sensu* Keuskamp et al. 2013); Stabilization ( $S$ ) = stabilization factor (*sensu* Keuskamp et al. 2013);  $\Delta$  = activity values in relation to the unplanted control (i.e. percentage change of planted vs. unplanted mesocosms) reflecting plant effects independent of direct (i.e. non-plant mediated) flooding effects.

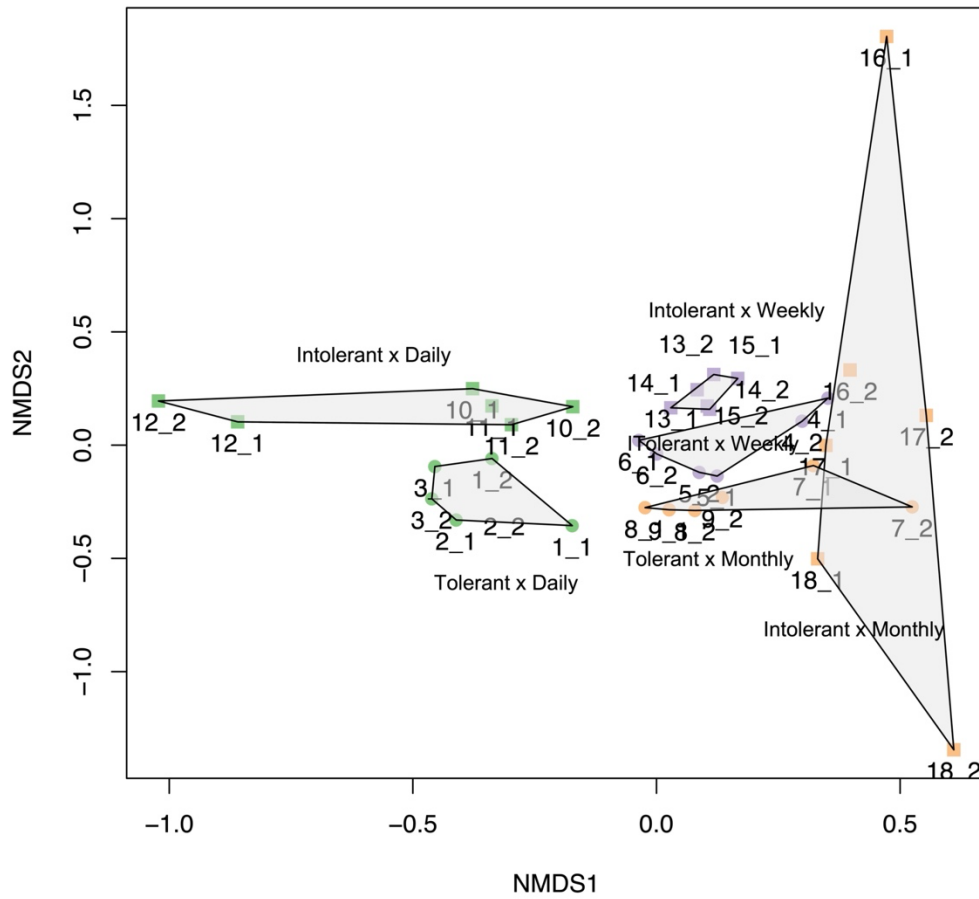

Figure S1: NMDS plot showing prokaryotic (bacterial + archaeal) community composition in soils planted with intolerant and tolerant plant genotypes of *Elymus athericus* exposed to three different flooding frequencies (monthly, weekly, and daily). Plot shows all technical replicates (i.e. two samples from n = 3 mesocosms). The ID showing labels (1-18) and technical-replicate labels (\_1 or \_2).

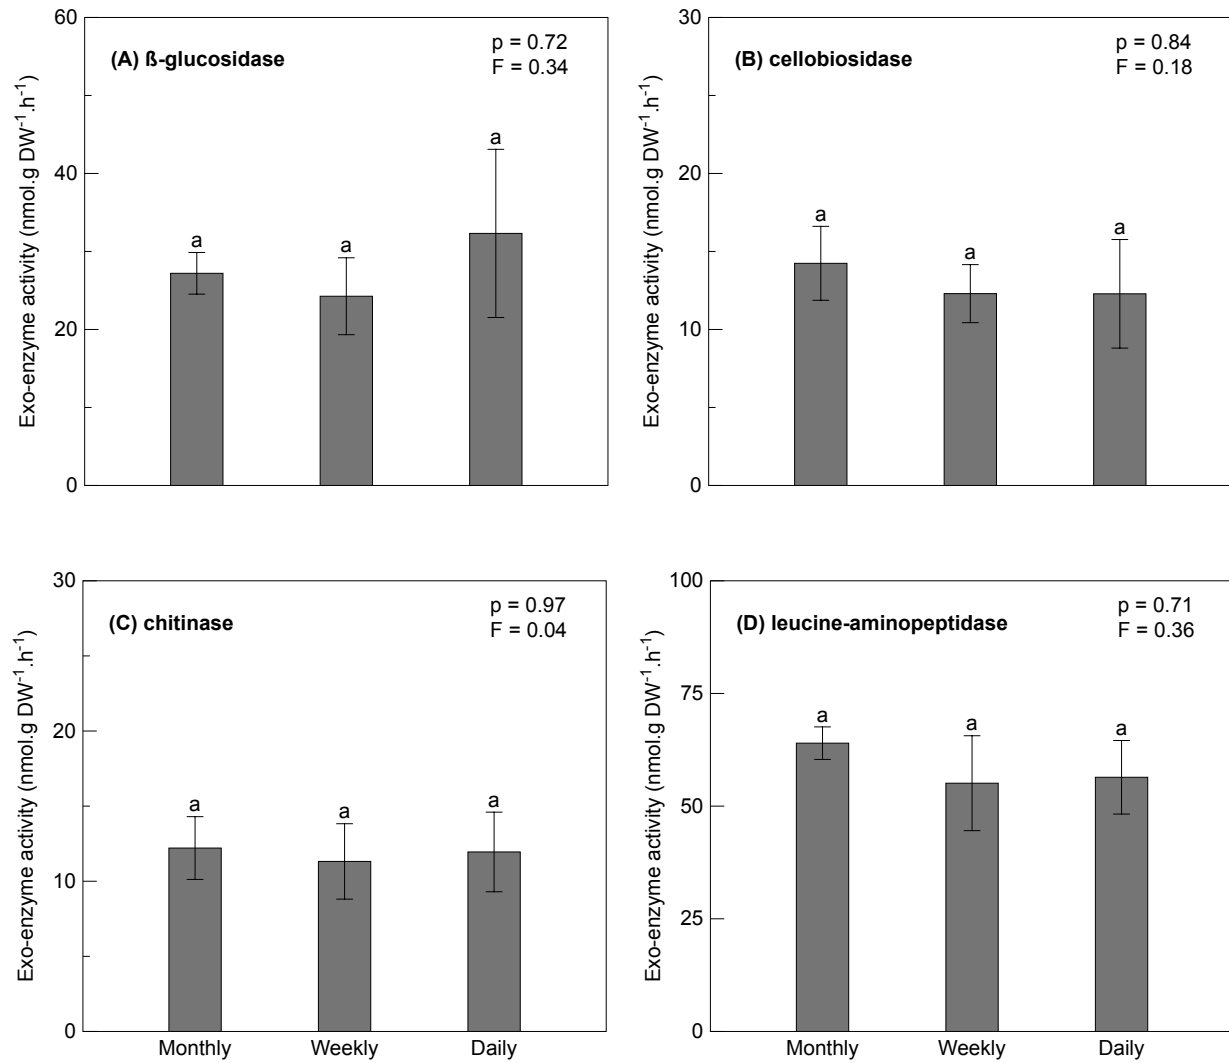

**Figure S2: Activities of the exo-enzymes  $\beta$ -glucosidase (A) and cellobiosidase (B) (microbial C acquisition) as well as chitinase (C) and leucine-aminopeptidase (D) (microbial N acquisition) in mesocosms containing soils without plants exposed to three different flooding frequencies (monthly, weekly and daily). Values are means and SE (n=4). No significant differences at  $p \leq 0.05$  based on Tukey's HSD were detected.**

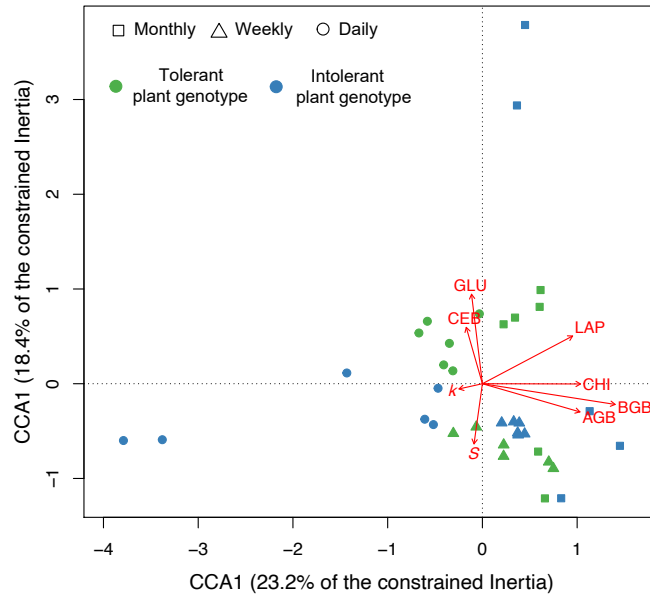

**Figure S3: CCA plot showing the relation of microbial community composition to plant biomass, microbial enzyme activity, and litter decomposition parameters. Notes: AGB = aboveground biomass, BGB = belowground biomass, GLU =  $\beta$ -glucosidase, CEB = cellobiosidase, CHI = chitinase, LAP = leucine-aminopeptidase,  $k$  = initial decomposition rate constant,  $S$  = stabilization factor. ANOVA-like permutation tests for Constrained Correspondence Analysis: AGB:  $F = 1.72$ ,  $p = 0.001$ ; BGB:  $F = 1.70$ ,  $p = 0.001$ ; GLU:  $F = 1.41$ ,  $p = 0.003$ ; CEB:  $F = 1.18$ ,  $p = 0.073$ ; CHI:  $F = 1.44$ ,  $p = 0.001$ ; LAP:  $F = 1.35$ ,  $p = 0.005$ ;  $k$ :  $F = 1.31$ ,  $p = 0.015$ ;  $S$ :  $F = 1.42$ ,  $p = 0.003$**

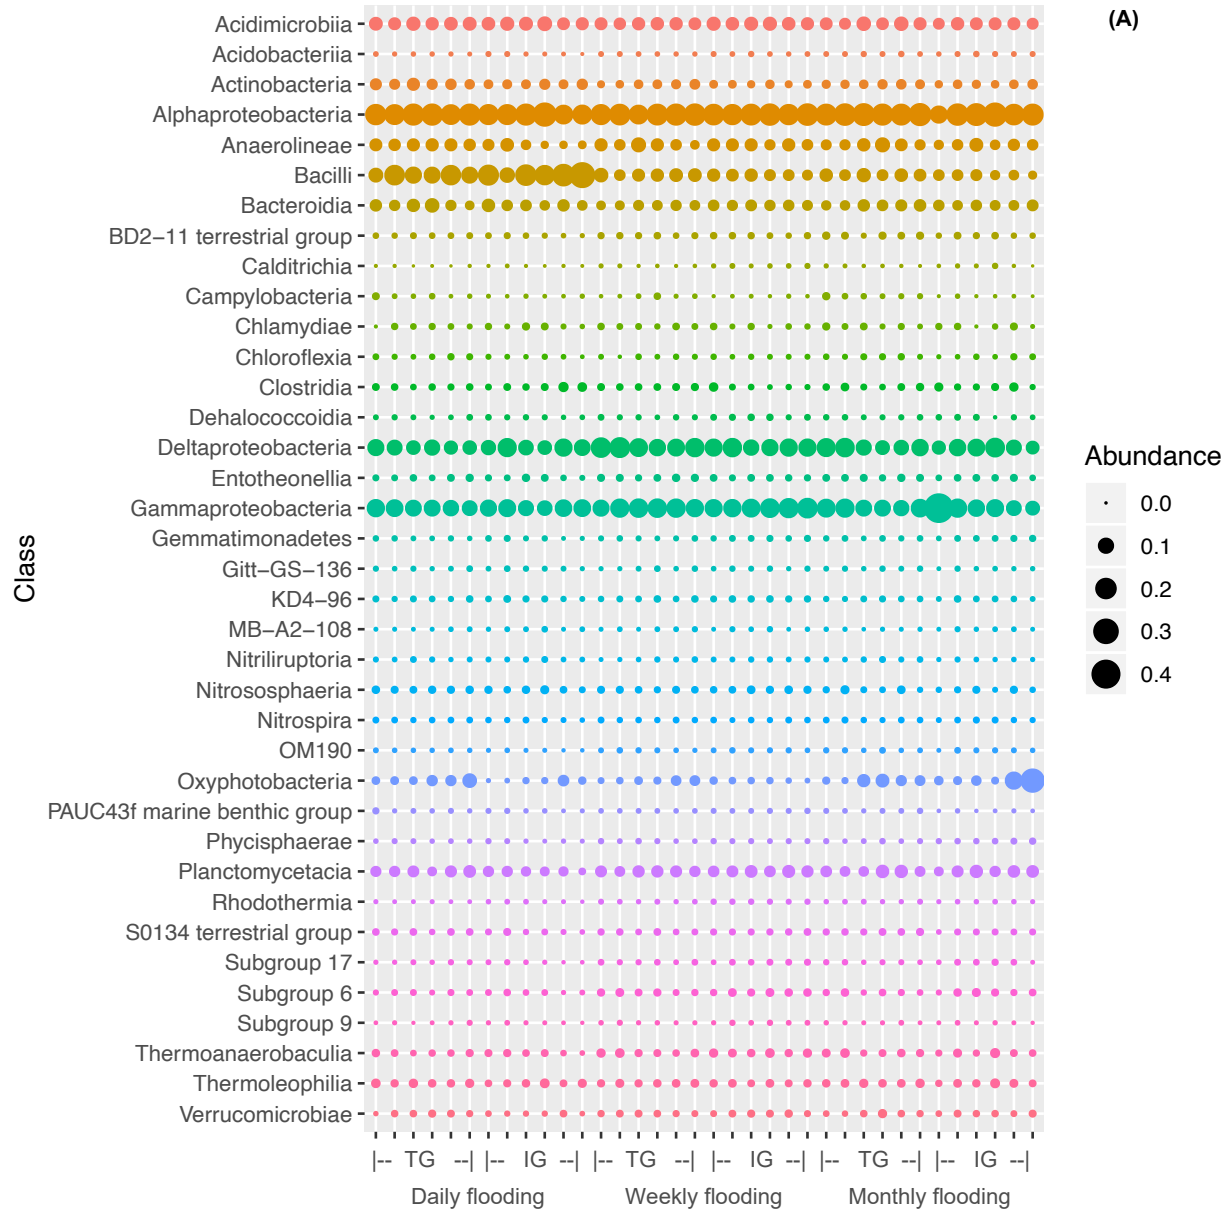

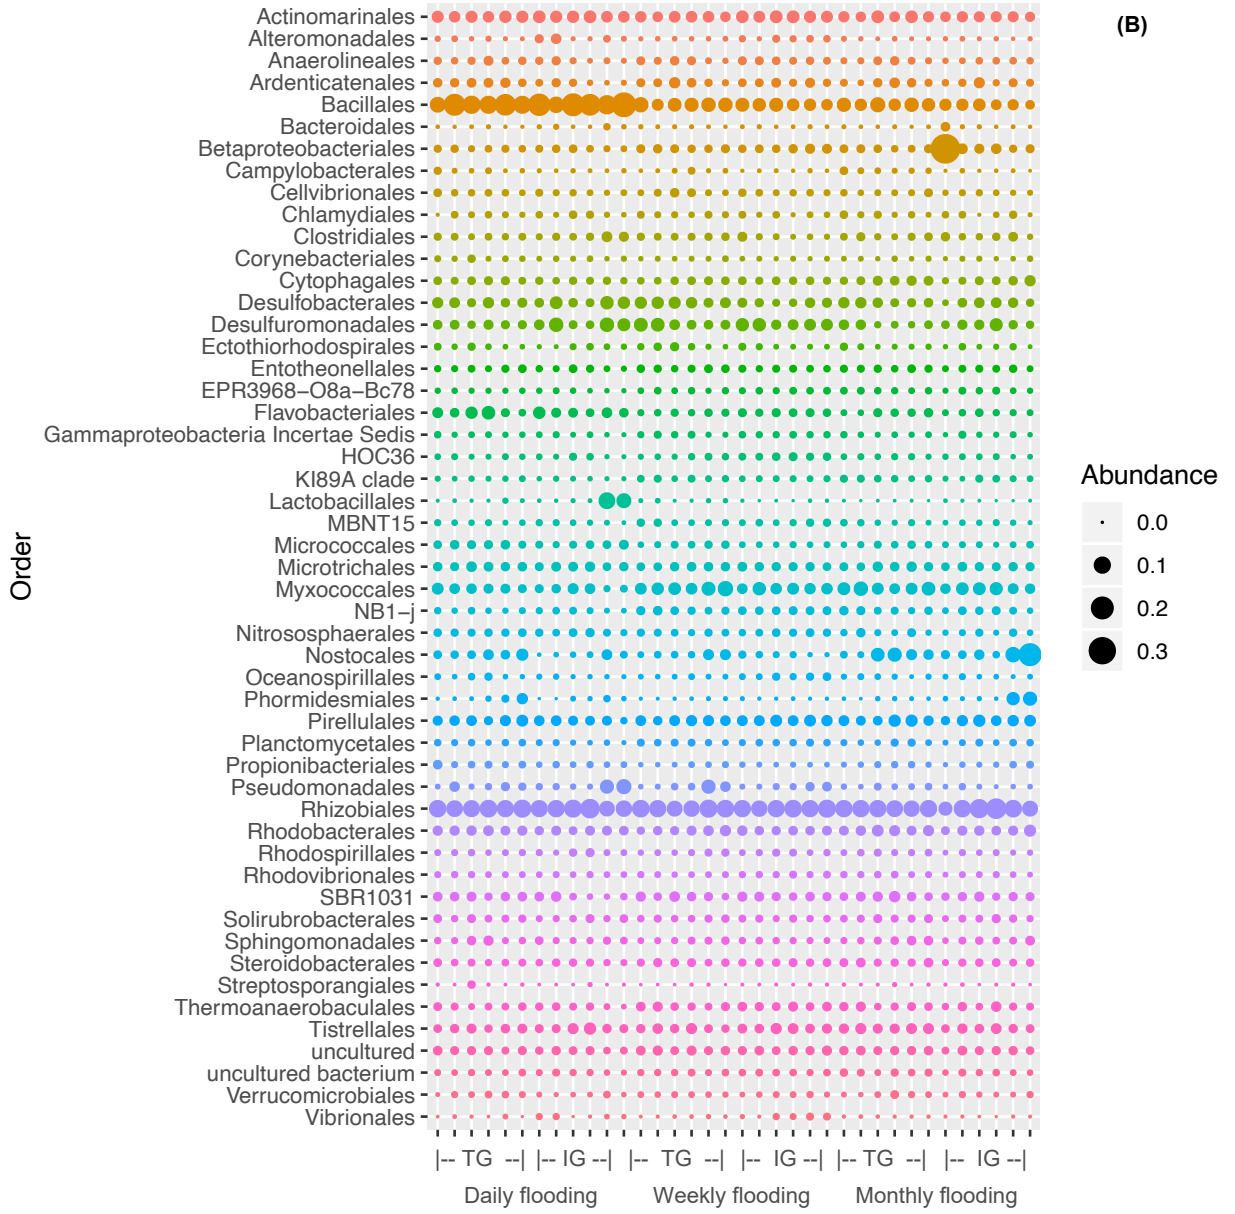

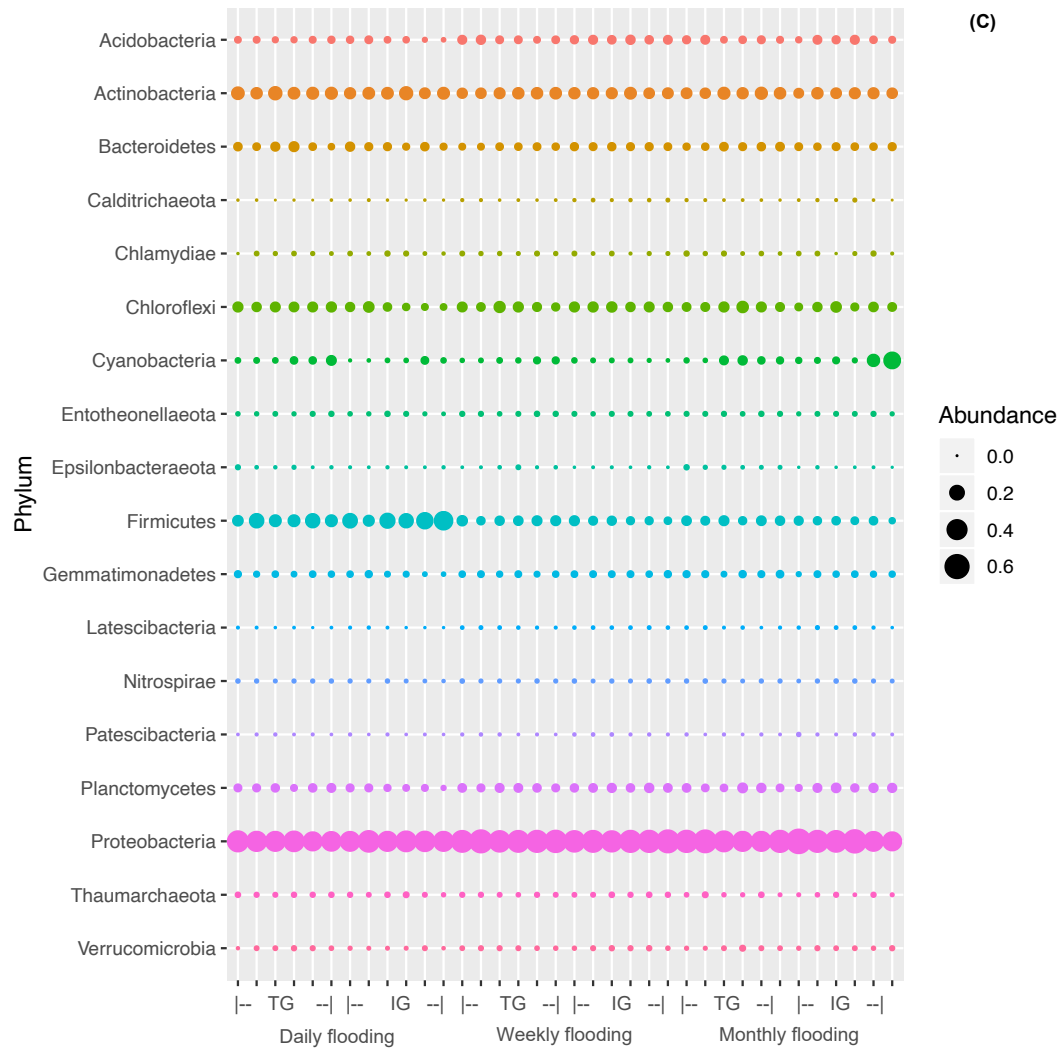

**Figure S4: Relative abundance of different microbial lineages. Along the horizontal axis samples are arranged according to tolerant (TG) and intolerant (IG) plant genotypes of the *Elymus athericus* exposed to three different flooding frequencies. The rank order along the vertical axis is shown for the class (A), order (B) and phylum (C).**



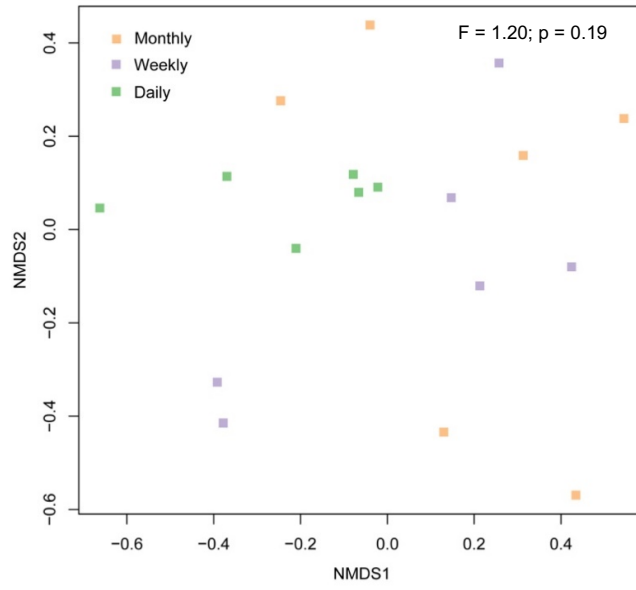

**Figure S5: NMDS plot showing prokaryotic (bacterial + archaeal) community composition in mesocosms containing soils without plants exposed to three different flooding frequencies (monthly, weekly and daily). One-way PERMANOVA results are included.**
